# Supplementary material
Source: publisher figshare collection journal article supplement (https://wiley.figshare.com/ndownloader/files/5629374)
Supplement: Supplementary file 1 [file 5629374]

site_name	year	species	acorn_count	mean_max_April_temp	mean_max_March_temp	March_rain	April_rain	March_rain_lagged1	April_rain_lagged1	mean_max_summer_temp
HASTINGS	1994	Q. douglasii	2.11	1944	1848	2767	7735	7519	1134	2909
HASTINGS	1995	Q. douglasii	0.594	1733	1432	43047	4368	2767	7735	2743
HASTINGS	1996	Q. douglasii	3.178	2057	1696	5690	5114	43047	4368	3045
HASTINGS	1997	Q. douglasii	2.262	2089	2029	801	851	5690	5114	2963
HASTINGS	1998	Q. douglasii	1.17	1584	1515	14284	9102	801	851	2620
HASTINGS	1999	Q. douglasii	2.705	1644	1386	12967	7235	14284	9102	2757
HASTINGS	2000	Q. douglasii	3.185	2054	1636	7021	4911	12967	7235	2909
HASTINGS	2001	Q. douglasii	0.461	1682	1758	8924	6212	7021	4911	3034
HASTINGS	2002	Q. douglasii	2.424	1900	1605	7590	1530	8924	6212	2902
HASTINGS	2003	Q. douglasii	0.21	1544	1757	4988	9415	7590	1530	2939
HASTINGS	2004	Q. douglasii	2.999	2220	2207	1923	680	4988	9415	2924
HASTINGS	2005	Q. douglasii	0.808	1817	1685	16355	6001	1923	680	2901
HASTINGS	2006	Q. douglasii	2.122	1445	940	17852	14203	16355	6001	2698
HASTINGS	2007	Q. douglasii	3.104	1834	1892	1987	3100	17852	14203	2642
HASTINGS	2008	Q. douglasii	1.659	1831	1566	310	542	1987	3100	2708
HASTINGS	2009	Q. douglasii	2.716	1748	1438	10489	1031	310	542	2645
HASTINGS	2010	Q. douglasii	1.439	1436	1419	5493	10776	10489	1031	2461
HASTINGS	2011	Q. douglasii	2.875	1550	1243	20089	962	5493	10776	2394
HASTINGS	1994	Q. lobata	2.68	1944	1848	2767	7735	7519	1134	2909
HASTINGS	1995	Q. lobata	0.383	1733	1432	43047	4368	2767	7735	2743
HASTINGS	1996	Q. lobata	2.153	2057	1696	5690	5114	43047	4368	3045
HASTINGS	1997	Q. lobata	2.157	2089	2029	801	851	5690	5114	2963
HASTINGS	1998	Q. lobata	0.984	1584	1515	14284	9102	801	851	2620
HASTINGS	1999	Q. lobata	1.559	1644	1386	12967	7235	14284	9102	2757
HASTINGS	2000	Q. lobata	3.536	2054	1636	7021	4911	12967	7235	2909
HASTINGS	2001	Q. lobata	0.78	1682	1758	8924	6212	7021	4911	3034
HASTINGS	2002	Q. lobata	2.889	1900	1605	7590	1530	8924	6212	2902
HASTINGS	2003	Q. lobata	0.134	1544	1757	4988	9415	7590	1530	2939
HASTINGS	2004	Q. lobata	3.051	2220	2207	1923	680	4988	9415	2924
HASTINGS	2005	Q. lobata	0.6	1817	1685	16355	6001	1923	680	2901
HASTINGS	2006	Q. lobata	1.301	1445	940	17852	14203	16355	6001	2698
HASTINGS	2007	Q. lobata	3.573	1834	1892	1987	3100	17852	14203	2642
HASTINGS	2008	Q. lobata	1.369	1831	1566	310	542	1987	3100	2708
HASTINGS	2009	Q. lobata	3.208	1748	1438	10489	1031	310	542	2645
HASTINGS	2010	Q. lobata	1.286	1436	1419	5493	10776	10489	1031	2461
HASTINGS	2011	Q. lobata	2.507	1550	1243	20089	962	5493	10776	2394
JASPER RIDGE	1994	Q. douglasii	1.461	2152	2157	1378	4364	7029	2383	2707
JASPER RIDGE	1995	Q. douglasii	0.062	2042	1801	24460	4333	1378	4364	2682
JASPER RIDGE	1996	Q. douglasii	2.019	2362	2159	7944	3782	24460	4333	2865
JASPER RIDGE	1997	Q. douglasii	1.393	2287	2132	1230	1097	7944	3782	2848
JASPER RIDGE	1998	Q. douglasii	0	2019	1872	6868	5311	1230	1097	2561
JASPER RIDGE	1999	Q. douglasii	2.497	2040	1595	7494	4953	6868	5311	2612
JASPER RIDGE	2000	Q. douglasii	3.264	2266	1948	5591	2927	7494	4953	2793
JASPER RIDGE	2001	Q. douglasii	0.295	1830	1915	4961	3534	5591	2927	2890
JASPER RIDGE	2002	Q. douglasii	0.441	2117	1931	7182	934	4961	3534	2706
JASPER RIDGE	2003	Q. douglasii	0.025	1839	2031	3542	10485	7182	934	2765
JASPER RIDGE	2004	Q. douglasii	2.953	2383	2361	2047	65	3542	10485	2722
JASPER RIDGE	2005	Q. douglasii	0.437	2071	2008	13587	5331	2047	65	2656
JASPER RIDGE	2006	Q. douglasii	0.089	1910	1453	21070	11615	13587	5331	2759
JASPER RIDGE	2007	Q. douglasii	2.849	2179	2083	904	1391	21070	11615	2687
JASPER RIDGE	2008	Q. douglasii	1.234	2156	1940	1198	425	904	1391	2726
JASPER RIDGE	2009	Q. douglasii	1.025	2246	1758	5486	676	1198	425	2642
JASPER RIDGE	2010	Q. douglasii	1.051	1862	1820	6257	9175	5486	676	2478
JASPER RIDGE	2011	Q. douglasii	1.365	1945	1649	17371	649	6257	9175	2472
JASPER RIDGE	1994	Q. lobata	2.014	2152	2157	1378	4364	7029	2383	2707
JASPER RIDGE	1995	Q. lobata	0.199	2042	1801	24460	4333	1378	4364	2682
JASPER RIDGE	1996	Q. lobata	1.41	2362	2159	7944	3782	24460	4333	2865
JASPER RIDGE	1997	Q. lobata	0.744	2287	2132	1230	1097	7944	3782	2848
JASPER RIDGE	1998	Q. lobata	0.092	2019	1872	6868	5311	1230	1097	2561
JASPER RIDGE	1999	Q. lobata	1.777	2040	1595	7494	4953	6868	5311	2612
JASPER RIDGE	2000	Q. lobata	3.007	2266	1948	5591	2927	7494	4953	2793
JASPER RIDGE	2001	Q. lobata	0.778	1830	1915	4961	3534	5591	2927	2890
JASPER RIDGE	2002	Q. lobata	0.89	2117	1931	7182	934	4961	3534	2706
JASPER RIDGE	2003	Q. lobata	0.053	1839	2031	3542	10485	7182	934	2765
JASPER RIDGE	2004	Q. lobata	2.656	2383	2361	2047	65	3542	10485	2722
JASPER RIDGE	2005	Q. lobata	0.304	2071	2008	13587	5331	2047	65	2656
JASPER RIDGE	2006	Q. lobata	0.453	1910	1453	21070	11615	13587	5331	2759
JASPER RIDGE	2007	Q. lobata	2.969	2179	2083	904	1391	21070	11615	2687
JASPER RIDGE	2008	Q. lobata	1.724	2156	1940	1198	425	904	1391	2726
JASPER RIDGE	2009	Q. lobata	1.41	2246	1758	5486	676	1198	425	2642
JASPER RIDGE	2010	Q. lobata	0.553	1862	1820	6257	9175	5486	676	2478
JASPER RIDGE	2011	Q. lobata	1.738	1945	1649	17371	649	6257	9175	2472
POZO	1994	Q. douglasii	2.52	2163	1911	7262	3959	14438	595	3130
POZO	1995	Q. douglasii	1	1982	1594	33885	1649	7262	3959	2939
POZO	1996	Q. douglasii	3.589	2315	1844	8079	3978	33885	1649	3173
POZO	1997	Q. douglasii	1.362	2237	2095	23	0	8079	3978	3098
POZO	1998	Q. douglasii	0.446	1829	1654	8552	5149	23	0	2831
POZO	1999	Q. douglasii	2.886	1871	1530	11744	3701	8552	5149	2953
POZO	2000	Q. douglasii	2.978	2301	1772	4359	5755	11744	3701	3118
POZO	2001	Q. douglasii	1.832	1913	1907	11780	2018	4359	5755	3241
POZO	2002	Q. douglasii	1.757	2169	1816	3593	499	11780	2018	3117
POZO	2003	Q. douglasii	0	1817	1904	5530	3120	3593	499	3112
POZO	2004	Q. douglasii	1.474	2466	2353	1264	0	5530	3120	3105
POZO	2005	Q. douglasii	0.21	2023	1819	9323	861	1264	0	3116
POZO	2006	Q. douglasii	1.186	1556	1020	14258	13940	9323	861	3009
POZO	2007	Q. douglasii	0.913	2067	1926	636	1676	14258	13940	3020
POZO	2008	Q. douglasii	0.127	2011	1610	0	77	636	1676	2959
POZO	2009	Q. douglasii	0	1803	1509	3517	1052	0	77	2936
POZO	2010	Q. douglasii	0.354	1545	1405	3074	7224	3517	1052	2809
POZO	2011	Q. douglasii	0.055	1633	1294	19140	296	3074	7224	2616
POZO	1994	Q. lobata	3.551	2163	1911	7262	3959	14438	595	3130
POZO	1995	Q. lobata	0.688	1982	1594	33885	1649	7262	3959	2939
POZO	1996	Q. lobata	3.525	2315	1844	8079	3978	33885	1649	3173
POZO	1997	Q. lobata	1.383	2237	2095	23	0	8079	3978	3098
POZO	1998	Q. lobata	0.328	1829	1654	8552	5149	23	0	2831
POZO	1999	Q. lobata	2.523	1871	1530	11744	3701	8552	5149	2953
POZO	2000	Q. lobata	3.403	2301	1772	4359	5755	11744	3701	3118
POZO	2001	Q. lobata	2.14	1913	1907	11780	2018	4359	5755	3241
POZO	2002	Q. lobata	3.329	2169	1816	3593	499	11780	2018	3117
POZO	2003	Q. lobata	0.144	1817	1904	5530	3120	3593	499	3112
POZO	2004	Q. lobata	2.128	2466	2353	1264	0	5530	3120	3105
POZO	2005	Q. lobata	0.921	2023	1819	9323	861	1264	0	3116
POZO	2006	Q. lobata	0.916	1556	1020	14258	13940	9323	861	3009
POZO	2007	Q. lobata	1.905	2067	1926	636	1676	14258	13940	3020
POZO	2008	Q. lobata	0.058	2011	1610	0	77	636	1676	2959
POZO	2009	Q. lobata	0	1803	1509	3517	1052	0	77	2936
POZO	2010	Q. lobata	1.979	1545	1405	3074	7224	3517	1052	2809
POZO	2011	Q. lobata	0.087	1633	1294	19140	296	3074	7224	2616
SEDGWICK	1994	Q. douglasii	3.374	2226	2202	7852	2173	16979	101	2994
SEDGWICK	1995	Q. douglasii	0.069	2247	1901	33003	1352	7852	2173	2925
SEDGWICK	1996	Q. douglasii	3.373	2594	2178	4880	2023	33003	1352	3192
SEDGWICK	1997	Q. douglasii	3.794	2454	2448	156	75	4880	2023	3085
SEDGWICK	1998	Q. douglasii	0.347	2071	1943	9527	8612	156	75	2801
SEDGWICK	1999	Q. douglasii	3.14	2015	1803	13351	7329	9527	8612	2829
SEDGWICK	2000	Q. douglasii	4.095	2446	2024	7024	11848	13351	7329	3037
SEDGWICK	2001	Q. douglasii	1.428	2087	2068	18403	4830	7024	11848	3120
SEDGWICK	2002	Q. douglasii	3.386	2358	2052	2147	505	18403	4830	3002
SEDGWICK	2003	Q. douglasii	0.329	2057	2150	7542	6435	2147	505	3022
SEDGWICK	2004	Q. douglasii	1.62	2588	2489	1345	130	7542	6435	3058
SEDGWICK	2005	Q. douglasii	1.487	2206	2026	8847	2679	1345	130	3010
SEDGWICK	2006	Q. douglasii	2.467	1879	1532	12179	16113	8847	2679	3081
SEDGWICK	2007	Q. douglasii	3.27	2369	2287	1226	2085	12179	16113	3072
SEDGWICK	2008	Q. douglasii	1.309	2413	2115	789	333	1226	2085	3086
SEDGWICK	2009	Q. douglasii	0.299	2249	1958	2484	868	789	333	3087
SEDGWICK	2010	Q. douglasii	2.642	1990	1999	1350	7408	2484	868	2850
SEDGWICK	2011	Q. douglasii	1.248	2225	1834	22281	492	1350	7408	2812
SEDGWICK	1994	Q. lobata	2.882	2226	2202	7852	2173	16979	101	2994
SEDGWICK	1995	Q. lobata	0.226	2247	1901	33003	1352	7852	2173	2925
SEDGWICK	1996	Q. lobata	2.472	2594	2178	4880	2023	33003	1352	3192
SEDGWICK	1997	Q. lobata	2.078	2454	2448	156	75	4880	2023	3085
SEDGWICK	1998	Q. lobata	0	2071	1943	9527	8612	156	75	2801
SEDGWICK	1999	Q. lobata	2.841	2015	1803	13351	7329	9527	8612	2829
SEDGWICK	2000	Q. lobata	2.721	2446	2024	7024	11848	13351	7329	3037
SEDGWICK	2001	Q. lobata	0.927	2087	2068	18403	4830	7024	11848	3120
SEDGWICK	2002	Q. lobata	2.758	2358	2052	2147	505	18403	4830	3002
SEDGWICK	2003	Q. lobata	0.641	2057	2150	7542	6435	2147	505	3022
SEDGWICK	2004	Q. lobata	1.107	2588	2489	1345	130	7542	6435	3058
SEDGWICK	2005	Q. lobata	1.545	2206	2026	8847	2679	1345	130	3010
SEDGWICK	2006	Q. lobata	0.671	1879	1532	12179	16113	8847	2679	3081
SEDGWICK	2007	Q. lobata	3.392	2369	2287	1226	2085	12179	16113	3072
SEDGWICK	2008	Q. lobata	2.068	2413	2115	789	333	1226	2085	3086
SEDGWICK	2009	Q. lobata	0.709	2249	1958	2484	868	789	333	3087
SEDGWICK	2010	Q. lobata	1.08	1990	1999	1350	7408	2484	868	2850
SEDGWICK	2011	Q. lobata	1.27	2225	1834	22281	492	1350	7408	2812
LIEBRE MTN	1994	Q. douglasii	1.875	1947	1760	5185	1351	10387	7	3017
LIEBRE MTN	1995	Q. douglasii	0.906	1704	1401	15007	2746	5185	1351	2786
LIEBRE MTN	1996	Q. douglasii	1.847	1923	1646	2776	535	15007	2746	2962
LIEBRE MTN	1997	Q. douglasii	0.5	1674	1793	0	0	2776	535	2734
LIEBRE MTN	1998	Q. douglasii	0.283	1360	1276	7296	3787	0	0	2519
LIEBRE MTN	1999	Q. douglasii	3.939	1323	1284	1478	5402	7296	3787	2645
LIEBRE MTN	2000	Q. douglasii	2.296	1925	1391	4379	4277	1478	5402	2818
LIEBRE MTN	2001	Q. douglasii	1.558	1515	1530	3745	2345	4379	4277	2947
LIEBRE MTN	2002	Q. douglasii	0.594	1841	1420	813	86	3745	2345	2866
LIEBRE MTN	2003	Q. douglasii	0	1271	1480	3524	4672	813	86	2805
LIEBRE MTN	2004	Q. douglasii	1.356	1920	2123	1254	233	3524	4672	2800
LIEBRE MTN	2005	Q. douglasii	0.139	1754	1265	2808	2014	1254	233	2712
LIEBRE MTN	2006	Q. douglasii	3.651	1661	1184	7479	5239	2808	2014	3171
LIEBRE MTN	2007	Q. douglasii	2.641	2214	2004	712	1048	7479	5239	3218
LIEBRE MTN	2008	Q. douglasii	0.888	2096	1756	0	365	712	1048	3041
LIEBRE MTN	2009	Q. douglasii	2.462	1920	1606	795	229	0	365	3070
LIEBRE MTN	2010	Q. douglasii	1.802	1604	1477	939	4732	795	229	2883
LIEBRE MTN	2011	Q. douglasii	1.253	1618	1267	10030	603	939	4732	2602
LIEBRE MTN	1999	Q. lobata	4.329	1323	1284	1478	5402	7296	3787	2645
LIEBRE MTN	2000	Q. lobata	4.028	1925	1391	4379	4277	1478	5402	2818
LIEBRE MTN	2001	Q. lobata	3.748	1515	1530	3745	2345	4379	4277	2947
LIEBRE MTN	2002	Q. lobata	2.362	1841	1420	813	86	3745	2345	2866
LIEBRE MTN	2003	Q. lobata	0	1271	1480	3524	4672	813	86	2805
LIEBRE MTN	2004	Q. lobata	1.805	1920	2123	1254	233	3524	4672	2800
LIEBRE MTN	2005	Q. lobata	0.75	1754	1265	2808	2014	1254	233	2712
LIEBRE MTN	2006	Q. lobata	4.484	1661	1184	7479	5239	2808	2014	3171
LIEBRE MTN	2007	Q. lobata	2.316	2214	2004	712	1048	7479	5239	3218
LIEBRE MTN	2008	Q. lobata	2.959	2096	1756	0	365	712	1048	3041
LIEBRE MTN	2009	Q. lobata	3.932	1920	1606	795	229	0	365	3070
LIEBRE MTN	2010	Q. lobata	2.118	1604	1477	939	4732	795	229	2883
LIEBRE MTN	2011	Q. lobata	0.231	1618	1267	10030	603	939	4732	2602
HOPLAND	1994	Q. douglasii	3.193	1811	1795	1161	7384	10007	7428	2658
HOPLAND	1995	Q. douglasii	0.15	1616	1277	61863	11634	1161	7384	2531
HOPLAND	1996	Q. douglasii	2.62	1765	1764	10727	11806	61863	11634	2774
HOPLAND	1997	Q. douglasii	2.073	1755	1751	9131	5820	10727	11806	2638
HOPLAND	1998	Q. douglasii	0.686	1531	1455	19462	9014	9131	5820	2465
HOPLAND	1999	Q. douglasii	3.175	1676	1213	19965	7768	19462	9014	2583
HOPLAND	2000	Q. douglasii	2.859	1925	1576	7087	7865	19965	7768	2696
HOPLAND	2001	Q. douglasii	0.601	1621	1828	9324	4975	7087	7865	2854
HOPLAND	2002	Q. douglasii	2.072	1860	1527	9133	3302	9324	4975	2788
HOPLAND	2003	Q. douglasii	0.124	1298	1649	13532	25715	9133	3302	2778
HOPLAND	2004	Q. douglasii	3.418	2035	2157	5201	2295	13532	25715	2773
HOPLAND	2005	Q. douglasii	0.09	1614	1644	24847	10772	5201	2295	2603
HOPLAND	2006	Q. douglasii	2.63	1297	658	39849	23572	24847	10772	2747
HOPLAND	2007	Q. douglasii	3.793	1641	1743	2862	6070	39849	23572	2699
HOPLAND	2008	Q. douglasii	1.101	1587	1403	3646	1180	2862	6070	2738
HOPLAND	2009	Q. douglasii	1.989	1510	1220	12653	1404	3646	1180	2653
HOPLAND	2010	Q. douglasii	1.175	1174	1205	17707	17701	12653	1404	2440
HOPLAND	2011	Q. douglasii	1.38	1284	872	43508	2171	17707	17701	2375
HOPLAND	1999	Q. lobata	2.244	1676	1213	19965	7768	19462	9014	2583
HOPLAND	2000	Q. lobata	3.021	1925	1576	7087	7865	19965	7768	2696
HOPLAND	2001	Q. lobata	2.928	1621	1828	9324	4975	7087	7865	2854
HOPLAND	2002	Q. lobata	2.74	1860	1527	9133	3302	9324	4975	2788
HOPLAND	2003	Q. lobata	0.11	1298	1649	13532	25715	9133	3302	2778
HOPLAND	2004	Q. lobata	3.575	2035	2157	5201	2295	13532	25715	2773
HOPLAND	2005	Q. lobata	0.993	1614	1644	24847	10772	5201	2295	2603
HOPLAND	2006	Q. lobata	0.409	1297	658	39849	23572	24847	10772	2747
HOPLAND	2007	Q. lobata	4.433	1641	1743	2862	6070	39849	23572	2699
HOPLAND	2008	Q. lobata	1.462	1587	1403	3646	1180	2862	6070	2738
HOPLAND	2009	Q. lobata	2.396	1510	1220	12653	1404	3646	1180	2653
HOPLAND	2010	Q. lobata	0.416	1174	1205	17707	17701	12653	1404	2440
HOPLAND	2011	Q. lobata	1.087	1284	872	43508	2171	17707	17701	2375
TOWER HOUSE	1994	Q. lobata	2.982	2049	1860	2066	10769	29357	11118	3132
TOWER HOUSE	1995	Q. lobata	1.099	1771	1297	58708	18127	2066	10769	2842
TOWER HOUSE	1996	Q. lobata	2.072	1882	1701	9313	9899	58708	18127	3125
TOWER HOUSE	1997	Q. lobata	0.33	1927	1838	7854	8551	9313	9899	3015
TOWER HOUSE	1998	Q. lobata	1.18	1740	1486	43746	17007	7854	8551	2796
TOWER HOUSE	1999	Q. lobata	2.345	1871	1254	27366	11648	43746	17007	2975
TOWER HOUSE	2000	Q. lobata	2.006	2079	1623	18379	19756	27366	11648	3050
TOWER HOUSE	2001	Q. lobata	3.803	1797	1856	11516	8955	18379	19756	3197
TOWER HOUSE	2002	Q. lobata	2.02	2157	1586	14822	6664	11516	8955	3129
TOWER HOUSE	2003	Q. lobata	0.092	1461	1611	20941	34338	14822	6664	3096
TOWER HOUSE	2004	Q. lobata	3.35	2159	2091	11875	10585	20941	34338	3127
TOWER HOUSE	2005	Q. lobata	0.372	1800	1717	34823	11888	11875	10585	2970
TOWER HOUSE	2006	Q. lobata	2.165	1570	780	37827	29941	34823	11888	3161
TOWER HOUSE	2007	Q. lobata	3.081	2041	1864	2520	7771	37827	29941	3147
TOWER HOUSE	2008	Q. lobata	1.296	1962	1545	1879	1564	2520	7771	3157
TOWER HOUSE	2009	Q. lobata	3.029	1976	1471	18733	5882	1879	1564	3142
TOWER HOUSE	2010	Q. lobata	0.727	1512	1418	10763	26151	18733	5882	2898
TOWER HOUSE	2011	Q. lobata	1.629	1759	1209	48826	5291	10763	26151	2867
DYE CREEK	1994	Q. douglasii	3.16	2189	1991	3087	4689	9430	8206	3175
DYE CREEK	1995	Q. douglasii	0.296	1886	1471	33903	12443	3087	4689	2939
DYE CREEK	1996	Q. douglasii	3.419	2088	1886	6386	10440	33903	12443	3234
DYE CREEK	1997	Q. douglasii	3.099	2136	2045	5177	3766	6386	10440	3205
DYE CREEK	1998	Q. douglasii	0.126	1804	1687	12120	7459	5177	3766	2966
DYE CREEK	1999	Q. douglasii	3.104	1938	1397	7504	3276	12120	7459	3090
DYE CREEK	2000	Q. douglasii	3.403	2199	1737	7365	6347	7504	3276	3169
DYE CREEK	2001	Q. douglasii	2.091	1895	1963	7213	5789	7365	6347	3313
DYE CREEK	2002	Q. douglasii	1.962	2157	1683	5301	3425	7213	5789	3252
DYE CREEK	2003	Q. douglasii	1.868	1546	1752	10415	14720	5301	3425	3215
DYE CREEK	2004	Q. douglasii	3.693	2272	2242	3880	1544	10415	14720	3241
DYE CREEK	2005	Q. douglasii	1.014	1894	1865	7815	6204	3880	1544	3156
DYE CREEK	2006	Q. douglasii	0.05	1811	1191	21635	19536	7815	6204	3233
DYE CREEK	2007	Q. douglasii	3.223	2158	2215	1764	5248	21635	19536	3203
DYE CREEK	2008	Q. douglasii	2.424	2119	1913	1125	967	1764	5248	3211
DYE CREEK	2009	Q. douglasii	1.445	2134	1783	8701	1669	1125	967	3167
DYE CREEK	2010	Q. douglasii	2.41	1694	1723	6590	12725	8701	1669	2952
DYE CREEK	2011	Q. douglasii	1.411	1826	1428	21683	3810	6590	12725	2852
DYE CREEK	1994	Q. lobata	3.746	2189	1991	3087	4689	9430	8206	3175
DYE CREEK	1995	Q. lobata	0.116	1886	1471	33903	12443	3087	4689	2939
DYE CREEK	1996	Q. lobata	1.358	2088	1886	6386	10440	33903	12443	3234
DYE CREEK	1997	Q. lobata	0.887	2136	2045	5177	3766	6386	10440	3205
DYE CREEK	1998	Q. lobata	0.227	1804	1687	12120	7459	5177	3766	2966
DYE CREEK	1999	Q. lobata	1.523	1938	1397	7504	3276	12120	7459	3090
DYE CREEK	2000	Q. lobata	1.806	2199	1737	7365	6347	7504	3276	3169
DYE CREEK	2001	Q. lobata	0.689	1895	1963	7213	5789	7365	6347	3313
DYE CREEK	2002	Q. lobata	2.08	2157	1683	5301	3425	7213	5789	3252
DYE CREEK	2003	Q. lobata	0.211	1546	1752	10415	14720	5301	3425	3215
DYE CREEK	2004	Q. lobata	2.71	2272	2242	3880	1544	10415	14720	3241
DYE CREEK	2005	Q. lobata	0.436	1894	1865	7815	6204	3880	1544	3156
DYE CREEK	2006	Q. lobata	0.336	1811	1191	21635	19536	7815	6204	3233
DYE CREEK	2007	Q. lobata	3.933	2158	2215	1764	5248	21635	19536	3203
DYE CREEK	2008	Q. lobata	0.908	2119	1913	1125	967	1764	5248	3211
DYE CREEK	2009	Q. lobata	3.521	2134	1783	8701	1669	1125	967	3167
DYE CREEK	2010	Q. lobata	1.386	1694	1723	6590	12725	8701	1669	2952
DYE CREEK	2011	Q. lobata	1.758	1826	1428	21683	3810	6590	12725	2852
SIERRA FOOT	1994	Q. douglasii	2.973	2100	1990	3005	5904	10648	7223	3092
SIERRA FOOT	1995	Q. douglasii	0	1887	1504	42358	8423	3005	5904	2886
SIERRA FOOT	1996	Q. douglasii	2.765	2101	1875	8848	13675	42358	8423	3156
SIERRA FOOT	1997	Q. douglasii	1.028	2085	2018	3837	2609	8848	13675	3071
SIERRA FOOT	1998	Q. douglasii	0.029	1731	1670	11772	10256	3837	2609	2813
SIERRA FOOT	1999	Q. douglasii	2.133	1883	1442	6482	5501	11772	10256	2939
SIERRA FOOT	2000	Q. douglasii	3.368	2181	1730	9869	5712	6482	5501	3060
SIERRA FOOT	2001	Q. douglasii	1.776	1807	1913	7442	6393	9869	5712	3223
SIERRA FOOT	2002	Q. douglasii	1.995	2040	1672	13989	2451	7442	6393	3133
SIERRA FOOT	2003	Q. douglasii	0.368	1507	1780	9624	17786	13989	2451	3095
SIERRA FOOT	2004	Q. douglasii	3.337	2166	2210	3772	1137	9624	17786	3107
SIERRA FOOT	2005	Q. douglasii	1.188	1910	1845	16613	4483	3772	1137	3040
SIERRA FOOT	2006	Q. douglasii	0	1728	1257	26413	20998	16613	4483	3215
SIERRA FOOT	2007	Q. douglasii	2.303	2200	2223	2064	6832	26413	20998	3214
SIERRA FOOT	2008	Q. douglasii	2.18	2149	1917	808	816	2064	6832	3251
SIERRA FOOT	2009	Q. douglasii	1.345	2005	1795	8006	2356	808	816	3145
SIERRA FOOT	2010	Q. douglasii	1.722	1657	1714	7347	18521	8006	2356	2975
SIERRA FOOT	2011	Q. douglasii	1.723	1823	1462	30435	3195	7347	18521	2841
SIERRA FOOT	2001	Q. lobata	2.776	1807	1913	7442	6393	9869	5712	3223
SIERRA FOOT	2002	Q. lobata	3.534	2040	1672	13989	2451	7442	6393	3133
SIERRA FOOT	2003	Q. lobata	0.077	1507	1780	9624	17786	13989	2451	3095
SIERRA FOOT	2004	Q. lobata	2.849	2166	2210	3772	1137	9624	17786	3107
SIERRA FOOT	2005	Q. lobata	0.725	1910	1845	16613	4483	3772	1137	3040
SIERRA FOOT	2006	Q. lobata	0.154	1728	1257	26413	20998	16613	4483	3215
SIERRA FOOT	2007	Q. lobata	4.049	2200	2223	2064	6832	26413	20998	3214
SIERRA FOOT	2008	Q. lobata	1.688	2149	1917	808	816	2064	6832	3251
SIERRA FOOT	2009	Q. lobata	2.93	2005	1795	8006	2356	808	816	3145
SIERRA FOOT	2010	Q. lobata	2.001	1657	1714	7347	18521	8006	2356	2975
SIERRA FOOT	2011	Q. lobata	1.707	1823	1462	30435	3195	7347	18521	2841
SAN JOAQUIN	1994	Q. douglasii	3.254	2308	1936	1250	4728	7310	860	3355
SAN JOAQUIN	1995	Q. douglasii	0	2045	1646	24121	4758	1250	4728	3153
SAN JOAQUIN	1996	Q. douglasii	2.467	2300	1842	6866	4194	24121	4758	3427
SAN JOAQUIN	1997	Q. douglasii	0.175	2393	2210	315	136	6866	4194	3385
SAN JOAQUIN	1998	Q. douglasii	0.235	1927	1765	12859	6324	315	136	3082
SAN JOAQUIN	1999	Q. douglasii	3.718	1971	1687	3071	4991	12859	6324	3215
SAN JOAQUIN	2000	Q. douglasii	1.771	2385	1787	5309	6695	3071	4991	3373
SAN JOAQUIN	2001	Q. douglasii	1.647	2018	1951	4537	5583	5309	6695	3523
SAN JOAQUIN	2002	Q. douglasii	2.4	2267	1790	4468	1658	4537	5583	3397
SAN JOAQUIN	2003	Q. douglasii	0	1895	1989	3270	7539	4468	1658	3406
SAN JOAQUIN	2004	Q. douglasii	2.407	2511	2323	2958	347	3270	7539	3406
SAN JOAQUIN	2005	Q. douglasii	0.346	2050	1880	10697	1840	2958	347	3356
SAN JOAQUIN	2006	Q. douglasii	0.192	2027	1513	12944	14889	10697	1840	3544
SAN JOAQUIN	2007	Q. douglasii	2.519	2391	2224	2220	1934	12944	14889	3534
SAN JOAQUIN	2008	Q. douglasii	1.105	2389	2009	322	163	2220	1934	3490
SAN JOAQUIN	2009	Q. douglasii	3.138	2365	1898	3325	1819	322	163	3517
SAN JOAQUIN	2010	Q. douglasii	0.941	1950	1864	3947	9398	3325	1819	3279
SAN JOAQUIN	2011	Q. douglasii	2.233	2165	1744	15145	1138	3947	9398	3237
KAWEAH OAKS	1999	Q. lobata	2.01	2183	1879	1802	4323	10979	6979	3260
KAWEAH OAKS	2000	Q. lobata	1.266	2612	2031	4705	2866	1802	4323	3421
KAWEAH OAKS	2001	Q. lobata	0.208	2239	2202	867	5728	4705	2866	3543
KAWEAH OAKS	2002	Q. lobata	2.193	2507	2077	3100	1180	867	5728	3429
KAWEAH OAKS	2003	Q. lobata	0	2149	2175	1808	4568	3100	1180	3436
KAWEAH OAKS	2004	Q. lobata	3.169	2668	2499	1731	222	1808	4568	3436
KAWEAH OAKS	2005	Q. lobata	0	2359	2101	6481	1525	1731	222	3429
KAWEAH OAKS	2006	Q. lobata	0.085	2109	1643	8919	10787	6481	1525	3478
KAWEAH OAKS	2007	Q. lobata	1.44	2478	2328	2386	1201	8919	10787	3460
KAWEAH OAKS	2008	Q. lobata	0.587	2487	2133	196	8	2386	1201	3445
KAWEAH OAKS	2009	Q. lobata	0.131	2473	2022	927	1382	196	8	3464
KAWEAH OAKS	2010	Q. lobata	1.759	2126	2014	1832	6762	927	1382	3240
KAWEAH OAKS	2011	Q. lobata	0	2271	1815	9012	1231	1832	6762	3181
KAWEAH RIVER	1999	Q. douglasii	2.918	1328	1215	5171	7551	16541	15237	2623
KAWEAH RIVER	2000	Q. douglasii	2.708	1904	1368	8573	7202	5171	7551	2760
KAWEAH RIVER	2001	Q. douglasii	0.425	1400	1403	3406	17102	8573	7202	2883
KAWEAH RIVER	2002	Q. douglasii	3.33	1691	1272	11655	3042	3406	17102	2764
KAWEAH RIVER	2003	Q. douglasii	0	1247	1378	9005	18379	11655	3042	2740
KAWEAH RIVER	2004	Q. douglasii	3.336	1964	1836	2992	776	9005	18379	2783
KAWEAH RIVER	2005	Q. douglasii	0.178	1508	1359	20878	5750	2992	776	2726
KAWEAH RIVER	2006	Q. douglasii	2.121	1396	690	26503	21195	20878	5750	2844
KAWEAH RIVER	2007	Q. douglasii	3.349	1671	1521	4899	5608	26503	21195	2813
KAWEAH RIVER	2008	Q. douglasii	1.081	1717	1296	1862	731	4899	5608	2805
KAWEAH RIVER	2009	Q. douglasii	0.462	1640	1173	6728	3731	1862	731	2811
KAWEAH RIVER	2010	Q. douglasii	0.617	1380	1152	9072	18342	6728	3731	2633
KAWEAH RIVER	2011	Q. douglasii	4.312	1532	1062	26116	1620	9072	18342	2565
